# Supplementary material
Source: PubMed Central journal article supplement (PMC4809926)
Supplement: JCM.00016-16_zjm999094856so1.pdf [file JCM.00016-16_zjm999094856so1.pdf]

**Supplemental Material to:**

**Bruker matrix-assisted laser desorption/ionization time-of-flight mass spectrometry identification of *Neisseria gonorrhoeae* is improved by a database extension.**

Valentijn A. Schweitzer, Alje P. van Dam, I Putu Yuda Hananta, Rob Schuurman, Johannes G. Kusters, Rob J. Rentenaar

**Table S1 Study isolates**

| Origin of isolate/strain             | NG17 MSP database construction |                  |       | Validation of database |                          |                           |                  |                        |                   |                |
|--------------------------------------|--------------------------------|------------------|-------|------------------------|--------------------------|---------------------------|------------------|------------------------|-------------------|----------------|
|                                      | <i>N. gonorrhoeae</i>          |                  |       | <i>N. gonorrhoeae</i>  |                          |                           |                  | <i>N. meningitidis</i> |                   |                |
|                                      | GRAS <sup>1</sup>              | PHL <sup>2</sup> | total | UMCU <sup>3</sup>      | PHL <sup>2</sup>         | Indonesia <sup>4</sup>    | WHO <sup>5</sup> | total                  | UMCU <sup>3</sup> |                |
| Year of isolation                    | 2013                           | 2014             |       | 2013                   | 2010 (n=7)<br>2014 (n=9) | 2014 (n=14)<br>2015 (n=3) |                  |                        | 2004-2013         |                |
| Geographical origin of isolate       | NL                             | NL               |       | NL                     | NL                       | Indonesia                 | see <sup>5</sup> |                        |                   |                |
| Number of isolates                   | 7                              | 10*              | 17    | 26                     | 16                       | 17                        | 5                | 64                     | 30                |                |
| Patient sex (n)                      | Male                           | -                | 10    | 10                     | 22                       | 16                        | 13               | -                      | 51                | 19             |
|                                      | Female                         | -                | -     | -                      | 4                        | -                         | 4                | -                      | 8                 | 10             |
|                                      | QC** (unknown sex)             | 7                | -     | 7                      | -                        | -                         |                  | 5                      | 5                 | 1              |
| Sample location (n)                  | Urethra                        | -                | 4     | 4                      | 15                       | 6                         | 13               | -                      | 34                | -              |
|                                      | Throat                         | -                | 4     | 4                      | 1                        | 2                         | -                | -                      | 3                 | -              |
|                                      | Anal/rectal                    | -                | 2     | 2                      | 10                       | 8                         | -                | -                      | 18                | -              |
|                                      | Endocervical                   | -                | -     | -                      | -                        | -                         | 4                | -                      | 4                 | -              |
|                                      | Blood                          | -                | -     | -                      | -                        | -                         | -                | -                      | -                 | 18             |
|                                      | Cerebrospinal fluid            | -                | -     | -                      | -                        | -                         | -                | -                      | -                 | 11             |
|                                      | Unknown                        | 7                | -     | 7                      | -                        | -                         |                  | 5                      | 5                 | 1              |
| <i>Neisseria gonorrhoeae</i> PCR (n) | Positive                       | 7                | 10    | 17                     | 26                       | 16                        | 17               | 5                      | 64                | -              |
|                                      | Negative                       | -                | -     | -                      | -                        | -                         | -                | -                      | -                 | 27             |
|                                      | Not tested                     | -                | -     | -                      | -                        | -                         | -                | -                      | -                 | 3 <sup>†</sup> |

<sup>1</sup>Gonococcal resistance against antibiotics surveillance project

<sup>2</sup>Public Health Laboratory, Cluster of Infectious Diseases, Health Service of Amsterdam,

<sup>3</sup>Department of Medical Microbiology, University Medical Centre Utrecht, The Netherlands.

<sup>4</sup>Jogjakarta (Java, n=9), Jakarta (Java, n=4), Denpasar (Bali, n=4)

<sup>5</sup>from reference strain panel, see ref Unemo JAC 2009 one isolate each from Japan, Philippines, USA, Canada, Thailand

\*Selected based on maximal disparity in MLVA analysis (data not shown).

\*\*Quality control strain.

\*\*\* NT: not tested

<sup>†</sup> isolates not available for PCR analysis.
