# Supplementary material
Source: PubMed Central journal article supplement (PMC4809926)
Supplement: JCM.00016-16_zjm999094856so2.pdf [file JCM.00016-16_zjm999094856so2.pdf]

**Supplemental Material to:**

**Bruker matrix-assisted laser desorption/ionization time-of-flight mass spectrometry identification of *Neisseria gonorrhoeae* is improved by a database extension.**

Valentijn A. Schweitzer, Alje P. van Dam, I Putu Yuda Hananta, Rob Schuurman, Johannes G. Kusters, Rob J. Rentenaar

**Table S2 MALDI-TOF MS *N. meningitidis* identification is not influenced by database extension with 17 *N. gonorrhoeae* main spectra**

|                                                                                                              | Database 5627       | Database 5627 + UMCU NG17 |
|--------------------------------------------------------------------------------------------------------------|---------------------|---------------------------|
| Number of <i>N. meningitidis</i> isolates                                                                    | 30                  | 30                        |
| Mean scorevalue of top database match (with <i>N. meningitidis</i> MSP) (range)                              | 2.315 (1.935-2.581) | 2.315 (1.935-2.581)       |
| Best database match with <i>N. meningitidis</i> MSP with scorevalue $\geq 2.000$                             | 29/30 (97%)         | 29/30 (97%)               |
| Best database match with <i>N. meningitidis</i> MSP with scorevalue $< 2.000$                                | 1/30 (3%)           | 1/30 (3%)                 |
| Database match among top 10 with <i>N. gonorrhoeae</i> MSP with scorevalue $\geq 2.000$                      | 0/29 (0%)           | 0/29 (0%)                 |
| B consistency due to database match among top 10 with <i>N. gonorrhoeae</i> MSP with scorevalue $\geq 2.000$ | 0/29 (0%)           | 0/29 (0%)                 |
| Median rank of best database match with <i>N. gonorrhoeae</i>                                                | 10 (9-10)           | 9 (8-10)                  |
| Mean scorevalue of best database match with <i>N. gonorrhoeae</i> (range)                                    | 1.616 (1.498-1.743) | 1.693 (1.416-1.949)       |
