# Supplementary material
Source: PubMed Central journal article supplement (PMC4809926)

**Supplemental Material to:**

**Bruker matrix-assisted laser desorption/ionization time-of-flight mass spectrometry identification of *Neisseria gonorrhoeae* is improved by a database extension.**

Valentijn A. Schweitzer, Alje P. van Dam, I Putu Yuda Hananta, Rob Schuurman, Johannes G. Kusters, Rob J. Rentenaar

**Legend to Figure S1.** Database extension with the NG17 database improves score values of unrelated *N. gonorrhoeae* isolates but does not influence score values of *N. meningitidis* isolates. Circles represent score values of individual isolates; a solid line connects each score value of an isolate analyzed with the 5627 and the 5627+ NG17 database. **A.** Database versus score value of best database match (with *N. gonorrhoeae* MSP in all isolates) among 42 *N. gonorrhoeae* isolates. **B.** Database versus score value of best database match (with *N. meningitidis* MSP in all isolates) of 30 *N. meningitidis* isolates.

**A** Scorevalue of best database match with *N. gonorrhoeae* MSP in *N. gonorrhoeae* isolates.

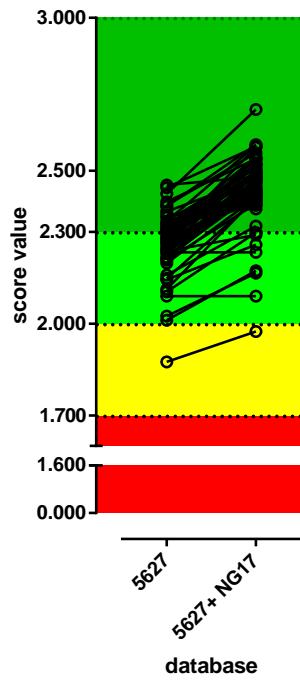

**B** Scorevalue of best database match with *N. meningitidis* MSP in *N. meningitidis* isolates.

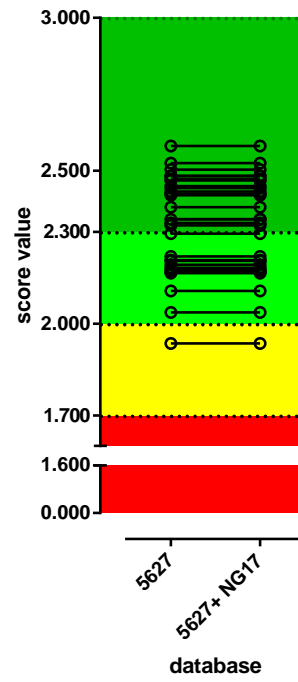

Supplement: JCM.00016-16_zjm999094856so3.pdf [file JCM.00016-16_zjm999094856so3.pdf]
