# Supplementary material
Source: PubMed Central journal article supplement (PMC4809926)

**Supplemental Material to:**

**Bruker matrix-assisted laser desorption/ionization time-of-flight mass spectrometry identification of *Neisseria gonorrhoeae* is improved by a database extension.**

Valentijn A. Schweitzer, Alje P. van Dam, I Putu Yuda Hananta, Rob Schuurman, Johannes G. Kusters, Rob J. Rentenaar

**Legend to figure S2.** All 17 newly created *N. gonorrhoeae* MSP's cluster with a single 5627 entry: ATCC49226 THL, and are more distantly related to the 6 other *N. gonorrhoeae* MSP's from the 5627 database. The figure represents an MSP dendrogram of all *Neisseria* MSP's from the 5627 and NG17 database.

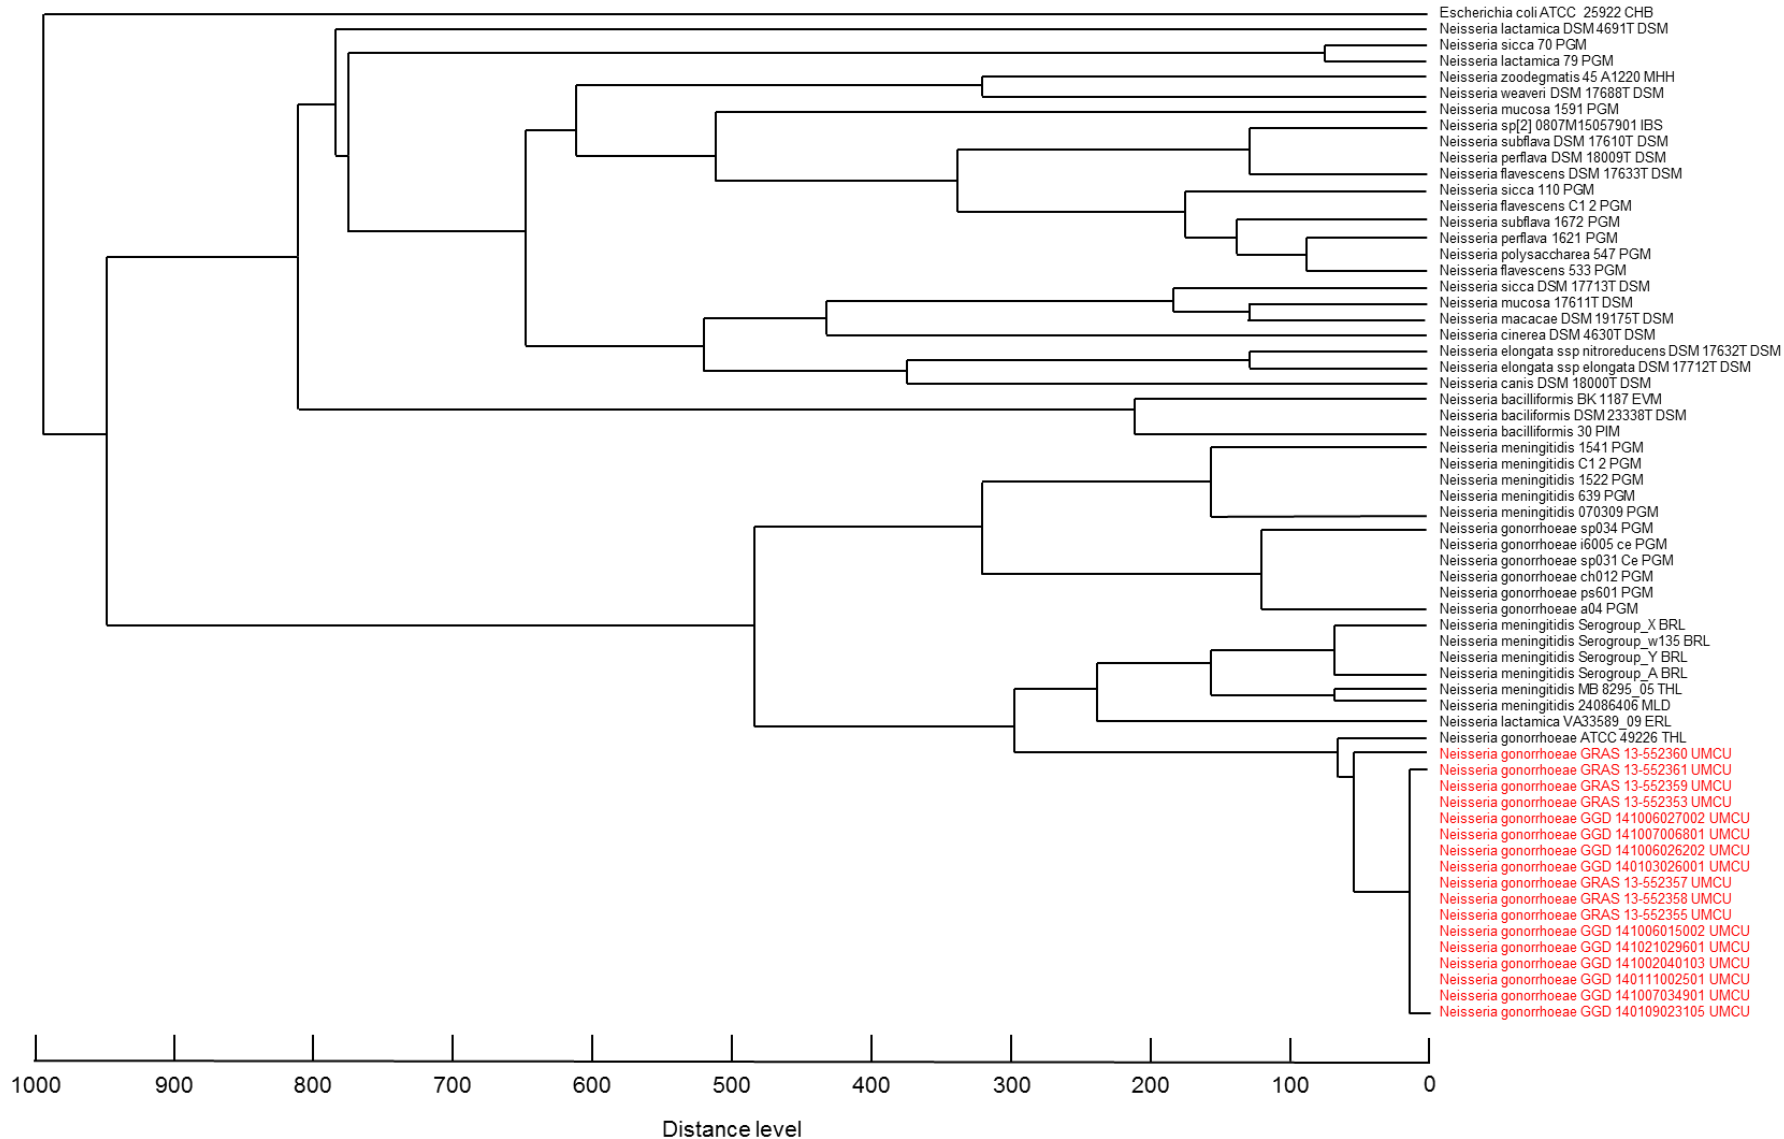

Supplement: JCM.00016-16_zjm999094856so4.pdf [file JCM.00016-16_zjm999094856so4.pdf]
